# Supplementary material
Source: PubMed Central journal article supplement (PMC164631)

4.5

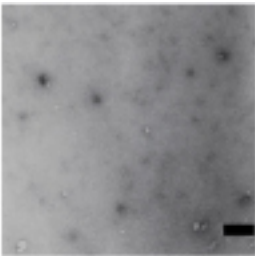

6.0

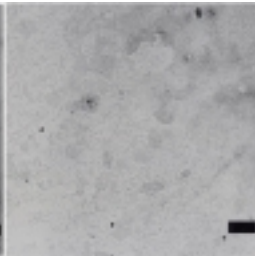

7.5

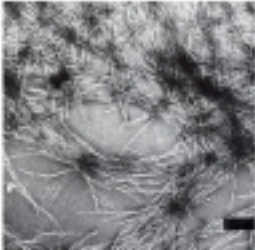

10.0

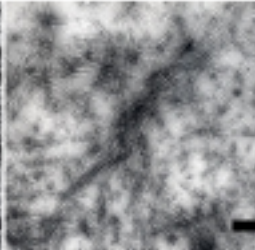

Supplement: pnas_1232504100_2.pdf [file pnas_1232504100_2.pdf]

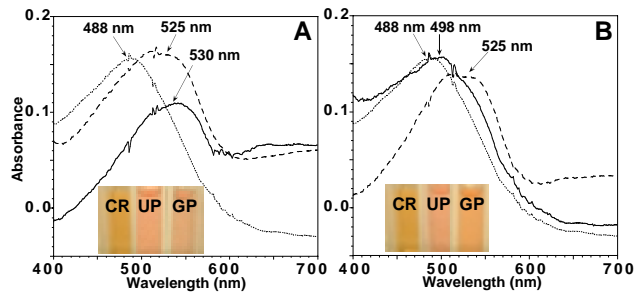

Supplement: pnas_1232504100_4.pdf [file pnas_1232504100_4.pdf]
